# Supplementary material for: Glycoprotein NMB: a novel Alzheimer’s disease associated marker expressed in a subset of activated microglia
Source: PubMed Central journal article supplement (PMC6194687; doi:10.1186/s40478-018-0612-3), 2018-10-19

### Additional file 5:

Correlation analysis between GPNMB-ELISA (TBS- and SDS-soluble fractions) and GPNMB expression levels measured by RT-PCR in a subset of mice were both protein and RNA samples were available from the same animal (n = 14).

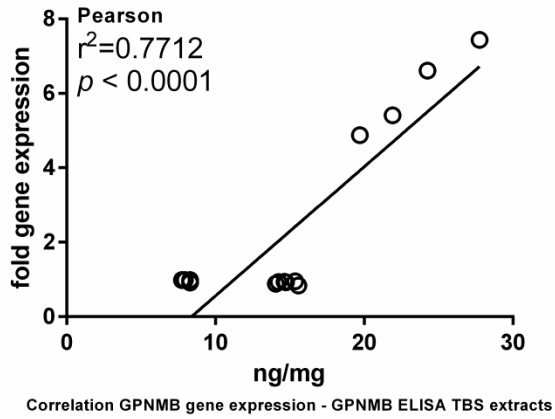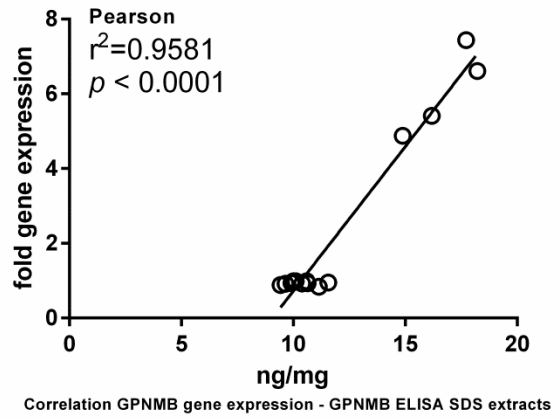

Supplement: 40478_2018_612_MOESM5_ESM.pdf [file 40478_2018_612_MOESM5_ESM.pdf]
