# Supplementary material for: Glycoprotein NMB: a novel Alzheimer’s disease associated marker expressed in a subset of activated microglia
Source: PubMed Central journal article supplement (PMC6194687; doi:10.1186/s40478-018-0612-3), 2018-10-19

## Additional file 7:

### Correlation analysis between GPNMB gene expression levels and microglia markers measured by RT-PCR.

Significant correlations between *GPNMB* and *CST7*, *AIF1*, *TREM2*, *APOE*, *CLEC7a* and *CCL2* were observed while no correlation could be detected between *GPNMB* and the homeostatic microglia marker *TMEM119*.

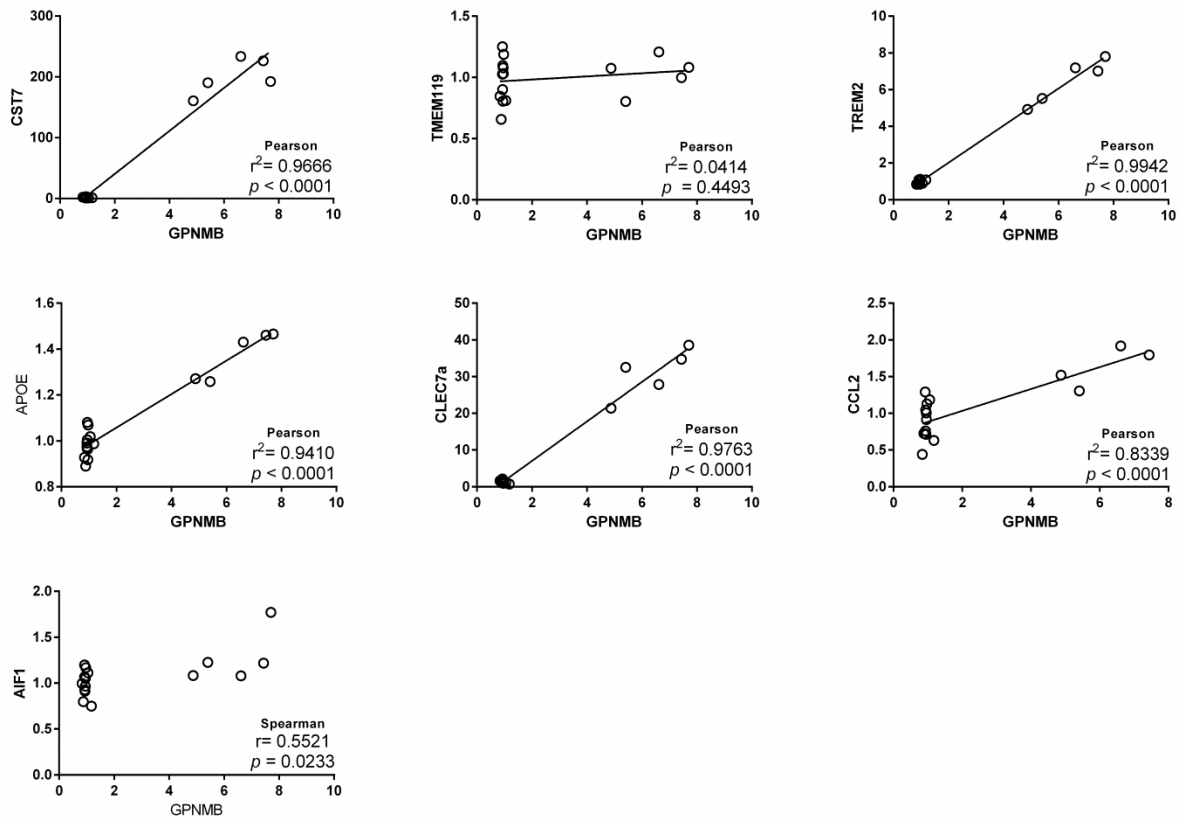

Supplement: 40478_2018_612_MOESM7_ESM.pdf [file 40478_2018_612_MOESM7_ESM.pdf]
