# Supplementary material for: Glycoprotein NMB: a novel Alzheimer’s disease associated marker expressed in a subset of activated microglia
Source: Springer Nature journal article supplement (doi:10.1186/s40478-018-0612-3), 2018-10-19
Supplement: MOESM1 [file 40478_2018_612_MOESM1_ESM.pdf]

## Additional file 1:

### Characteristics of the study cohorts used for ELISA measurements

Demographic data and neuropathological data for the human donors as provided by the Netherlands Brain Bank (NBB) and correlation analysis for GPNMB levels in brain extracts and neuropathological measures.

|              | AD            | NDC          | <i>p</i> -value |
|--------------|---------------|--------------|-----------------|
| Number       | 9             | 9            |                 |
| Gender (M/F) | 2/7           | 2/7          | > 0.999         |
| Age (y)      | 79.78 ± 11.28 | 82.00 ± 9.77 | 0.5884          |

| Case  | Sex | Age (y) | PMD   | Braak stage | Amyloid |
|-------|-----|---------|-------|-------------|---------|
| AD-1  | M   | 78      | 07:45 | V           | C       |
| AD-2  | M   | 82      | 05:05 | V           | C       |
| AD-3  | F   | 82      | 04:20 | VI          | C       |
| AD-4  | F   | 54      | 06:35 | VI          | C       |
| AD-5  | F   | 85      | 05:10 | VI          | C       |
| AD-6  | F   | 86      | 05:40 | VI          | C       |
| AD-7  | F   | 96      | 05:50 | V           | C       |
| AD-8  | F   | 77      | 06:05 | V           | C       |
| AD-9  | F   | 78      | 03:45 | VI          | C       |
| NDC-1 | F   | 85      | 04:40 | II          | A       |
| NDC-2 | F   | 85      | 05:19 | II          | B       |
| NDC-3 | M   | 96      | 05:23 | I           | B       |
| NDC-4 | F   | 60      | 07:30 | I           | A       |
| NDC-5 | F   | 77      | 02:55 | I           | B       |
| NDC-6 | F   | 82      | 05:10 | II          | 0       |
| NDC-7 | F   | 84      | 06:55 | I           | 0       |
| NDC-8 | M   | 81      | 07:55 | II          | 0       |
| NDC-9 | F   | 88      | 06:15 | n.d.        | B       |

n.d.: not determined

| Correlation                       | Spearman <i>r</i> | 95% confidence interval | P value |
|-----------------------------------|-------------------|-------------------------|---------|
| GPNMB-TBS (ng/mg) - Amyloid score | 0.2848            | -0.2243 to 0.6717       | 0.2521  |
| GPNMB-TBS (ng/mg) - Braak stage   | 0.3251            | -0.1993 to 0.7047       | 0.2014  |
| GPNMB-SDS (ng/mg) - Amyloid score | 0.3838            | -0.1160 to 0.7285       | 0.1159  |
| GPNMB-SDS (ng/mg) - Braak stage   | 0.605             | -0.1605 to 0.7244       | 0.1547  |

**Characteristics of the study cohort used for CSF and serum measurements.**

|                  | AD                     | NDC                   | <i>p</i> -value |
|------------------|------------------------|-----------------------|-----------------|
| Number           | 10                     | 10                    |                 |
| Gender (M/F)     | 8/2                    | 5/5                   | 0.3498          |
| Age (y)          | 70.4 ± 7.6             | 62.5 ± 9.3            | 0.052           |
| CSF Aβ (pg/ml)   | 472.9 ± 106.2 (n = 10) | 1637 ± 215.4(n = 4)   | <0.0001         |
| CSF tTau (pg/ml) | 756.1 ± 298.1 (n = 10) | 457.8 ± 300.8 (n=4)   | 0.1172          |
| CSF pTau (pg/ml) | 96.5 ± 60.97 (n = 10)  | 40.00 ± 41.46 (n = 4) | 0.1181          |

| Case   | Sex | Age (y) at LP |
|--------|-----|---------------|
| AD-10  | F   | 59            |
| AD-11  | F   | 68            |
| AD-12  | F   | 76            |
| AD-13  | F   | 73            |
| AD-14  | M   | 61            |
| AD-15  | F   | 66            |
| AD-16  | F   | 82            |
| AD-17  | F   | 75            |
| AD-18  | M   | 78            |
| AD-19  | F   | 66            |
|        |     |               |
| NDC-10 | F   | 76            |
| NDC-11 | M   | 74            |
| NDC-12 | M   | 74            |
| NDC-13 | F   | 63            |
| NDC-14 | F   | 64            |
| NDC-15 | F   | 51            |
| NDC-16 | M   | 57            |
| NDC-17 | M   | 57            |
| NDC-18 | F   | 57            |
| NDC-19 | M   | 52            |
