# Supplementary material for: Glycoprotein NMB: a novel Alzheimer’s disease associated marker expressed in a subset of activated microglia
Source: Springer Nature journal article supplement (doi:10.1186/s40478-018-0612-3), 2018-10-19
Supplement: MOESM2 [file 40478_2018_612_MOESM2_ESM.pdf]

**Additional file 2:**

**Primers used for RT-PCR in the present study:**

| <b>Gene</b>    | <b>Forward (5' – 3')</b>  | <b>Reverse (5' – 3')</b> |
|----------------|---------------------------|--------------------------|
| $\beta$ -ACTIN | ATGGAGGGGAATACAGCCC       | TTCTTTGCAGCTCCTTCGTT     |
| AIF1 (IBA1)    | CAGACTGCCAGCCTAAGACA      | AGGAATTGCTTGTGATCCC      |
| APOE           | GAGCTGATCTGTCACCTCCG      | GGACTTGTTCGGAAGGAGC      |
| CCL2           | GGGATCATCTTGCTGGTGAA      | AGGTCCCTGTCATGCTTCTG     |
| CLEC7a         | AAGCTTTCCTGGGGAAGTGT      | CCAAACATCGTCTCACCGTA     |
| CST7           | AAGCACTCCTGGGTTATTGG      | TGCCTAACTTCTGACACCCA     |
| TMEM119        | ATAGCTCAACATGGTCCCCTGGTTC | GGCCTGTTAGACACTGGGGGAGAC |
| TREM2          | CCCTCGAAACTCGATGACTC      | TGCAGAAAGTACTGGTGGAGG    |
| MITF           | TTGATGGATCCGGCCTTGCAAATG  | TATGTTGGGAAGGTTGGCTGGACA |

Primers for murine TGF $\beta$ 1 and IL1- $\beta$  were purchased from Qiagen as verified primer sets (QuantiTect Primer Assays).
