# Supplementary material for: Glycoprotein NMB: a novel Alzheimer’s disease associated marker expressed in a subset of activated microglia
Source: Springer Nature journal article supplement (doi:10.1186/s40478-018-0612-3), 2018-10-19

**Additional file 4:**

Immunostaining against A $\beta$  and GPNMB in parallel sections in the cortex of a 12-month-old APP23 mouse. Inset shows higher magnification of the boxed area. Scale bar: 200  $\mu$ m

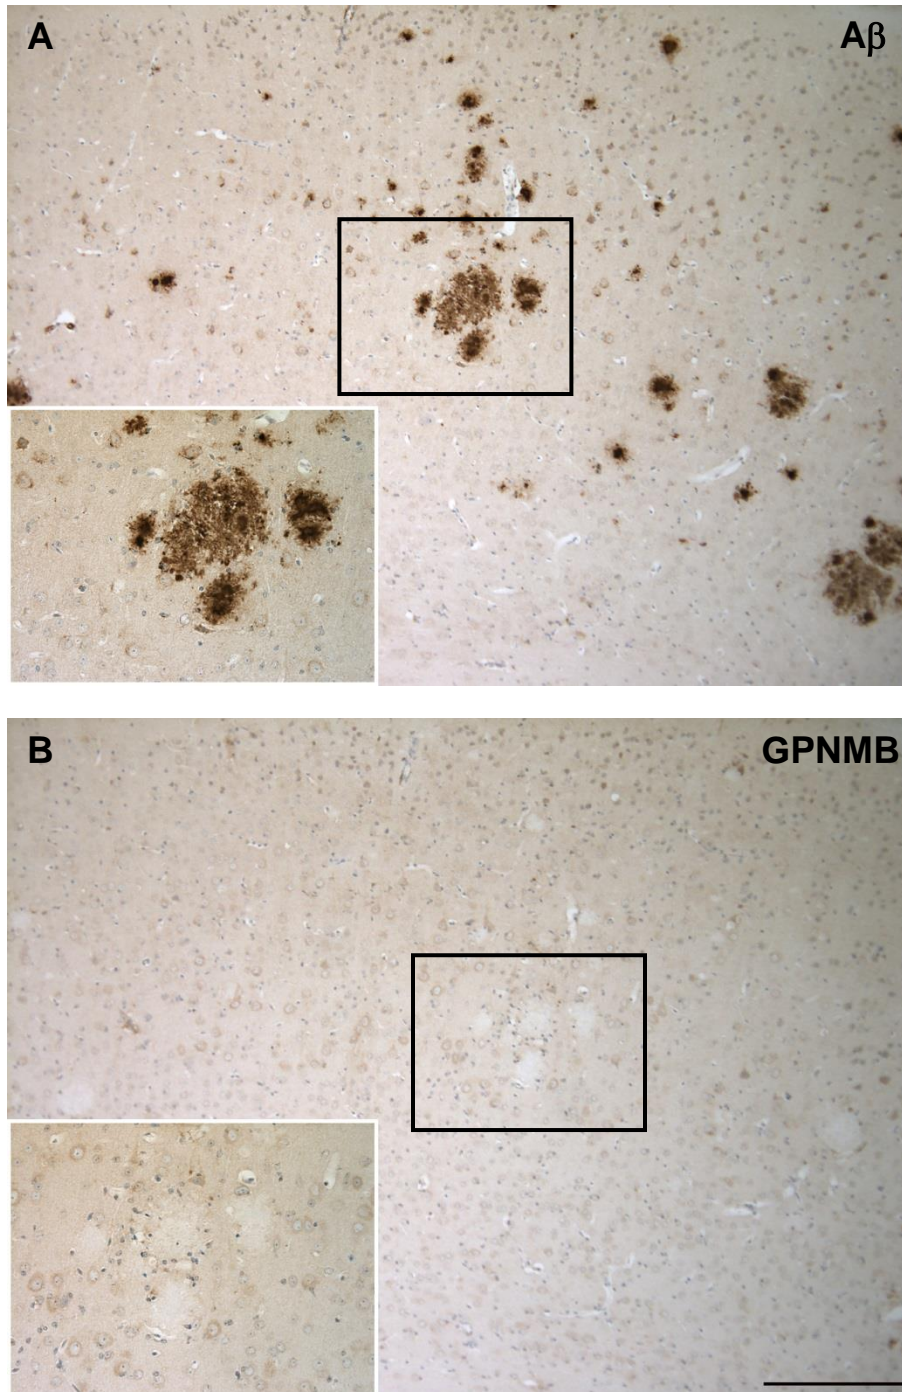

Supplement: MOESM4 [file 40478_2018_612_MOESM4_ESM.pdf]
