# Supplementary material for: Glycoprotein NMB: a novel Alzheimer’s disease associated marker expressed in a subset of activated microglia
Source: Springer Nature journal article supplement (doi:10.1186/s40478-018-0612-3), 2018-10-19

**Additional file 6:**

High magnification of an amyloid plaque surrounded by GPNMB-positive microglia

(A) A $\beta$  (green, antibody IC16) and GPNMB (red) staining in the cortex of a 12-month-old 5XFAD mouse revealed GPNMB-positive microglia clustering around a central dense plaque core without labeling the plaque periphery (dashed line).

(B) Higher magnification of the area indicated in A.

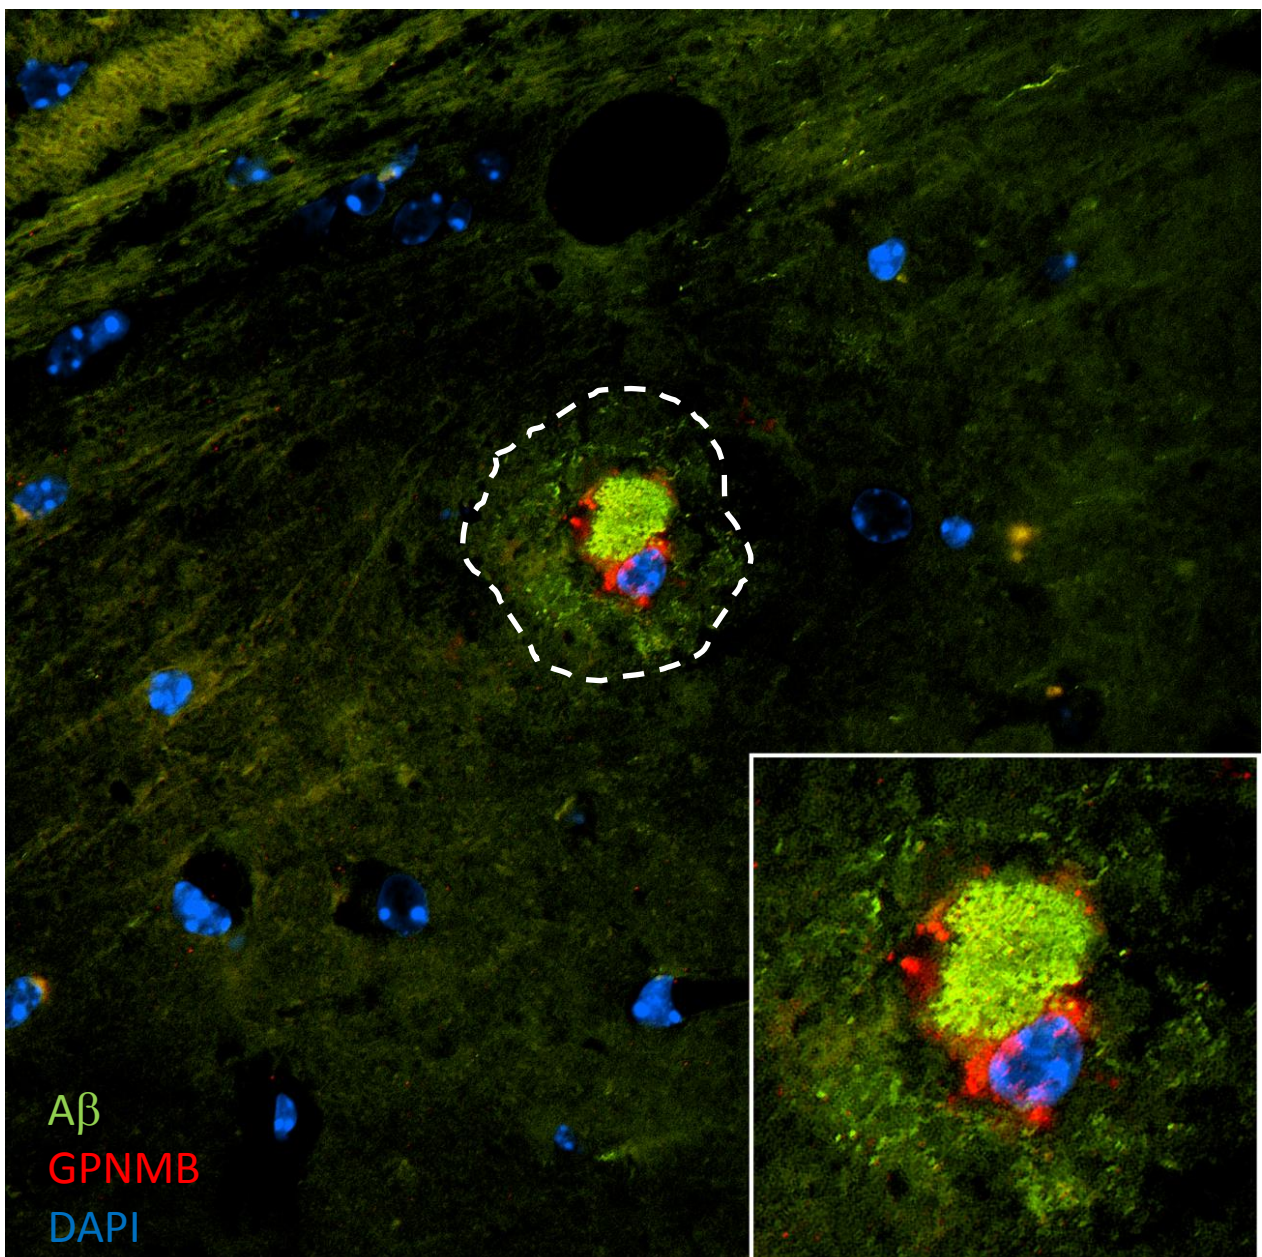

Supplement: MOESM6 [file 40478_2018_612_MOESM6_ESM.pdf]
