# Supplementary material for: Glycoprotein NMB: a novel Alzheimer’s disease associated marker expressed in a subset of activated microglia
Source: Springer Nature journal article supplement (doi:10.1186/s40478-018-0612-3), 2018-10-19
Supplement: MOESM9 [file 40478_2018_612_MOESM9_ESM.pdf]

### Additional file 9:

#### Peptide competition assay

In order to further investigate the specificity of the GPNMB antibody (sc-47006, Santa Cruz), an immunoadsorption experiment was carried out using the respective blocking peptide (sc-47006P). 1  $\mu$ g GPNMB peptide was incubated with the antibody (1:200) in phosphate-buffered saline (PBS) for 5 h at room temperature with continuous agitation and followed by centrifugation at 14.000 x g for 5 min as published previously. The supernatant was used for immunohistochemistry as described in the Material and Methods part.

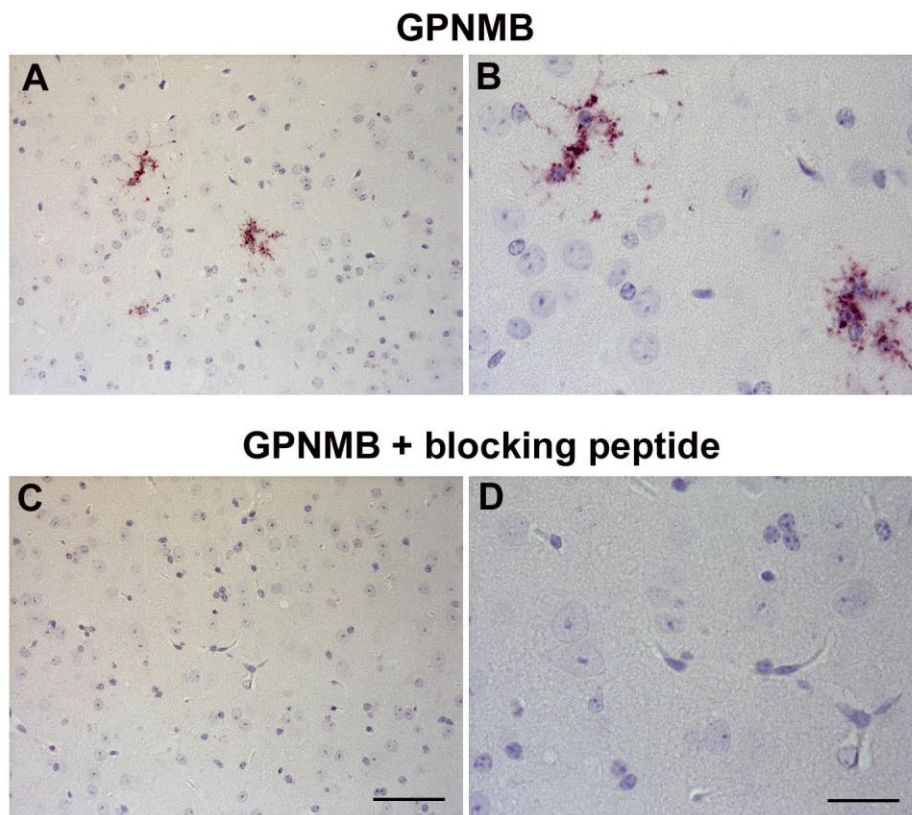

**Figure S3:** The use of 1  $\mu$ g blocking peptide completely abolished GPNMB immunoreactivity in a human AD case. Scale bar: A,C = 50  $\mu$ m; B,D = 20  $\mu$ m
