# Supplementary material for: Glycoprotein NMB: a novel Alzheimer’s disease associated marker expressed in a subset of activated microglia
Source: Springer Nature journal article supplement (doi:10.1186/s40478-018-0612-3), 2018-10-19
Supplement: MOESM10 [file 40478_2018_612_MOESM10_ESM.pdf]

**Additional file 10:**Intra-assay variation of the ELISA measurements of the different sample matrices

| Intra-assay variation of the ELISA measurements of the different sample matrices |                                                 |    |                      |        |              |
|----------------------------------------------------------------------------------|-------------------------------------------------|----|----------------------|--------|--------------|
| Assay                                                                            | Sample matrix                                   | n  | mean intra-assay CV* | median | range        |
| Mouse Osteoactivin/ GPNMB ELISA                                                  | TBS brain extracts from 12 months old mice      | 40 | 3,02%                | 2,19%  | 0.11-16.01%  |
| Mouse Osteoactivin/ GPNMB ELISA                                                  | SDS brain extracts from 12 months old mice      | 40 | 3,35%                | 2,76%  | 0.28-10.99%  |
| Mouse Osteoactivin/ GPNMB ELISA                                                  | TBS spinal cord extract from 12 months old mice | 8  | 1,28%                | 2,17%  | 0.25-3.05%   |
| Mouse Osteoactivin/ GPNMB ELISA                                                  | SDS spinal cord extract from 12 months old mice | 8  | 4,17%                | 4,03%  | 0.23-8.85%   |
| Human Osteoactivin / GPNMB ELISA                                                 | Human cerebrospinal fluid                       | 19 | 9,57%                | 8,70%  | 0.41-20.5%   |
| Human Osteoactivin / GPNMB ELISA                                                 | Human blood serum                               | 19 | 17,21%               | 5,91%  | 0.38-141.42% |
| Human Osteoactivin / GPNMB ELISA                                                 | Human brain TBS extracts                        | 18 | 3,74%                | 2,86%  | 0.11-8.77%   |
| Human Osteoactivin / GPNMB ELISA                                                 | Human brain SDS extracts                        | 18 | 3,49%                | 2,61%  | 0-16.9%      |

\* The GPNMB levels in all samples were measured in duplicates. For each individual sample the % CV (relative standard deviation) was calculated by dividing the SD of the duplicates by their mean and multiplying by 100. For each sample type the average of the individual CVs is reported.
